# Supplementary material for: In Situ Adsorption of Red Onion (Allium cepa) Natural Dye on Cellulose Model Films and Fabrics Exploiting Chitosan as a Natural Mordant
Source: PubMed Central journal article supplement (PMC9933475; doi:10.1021/acsomega.2c06650), 2023-02-01
Supplement: ao2c06650_si_001.pdf [file ao2c06650_si_001.pdf]

**SUPPLEMENTARY INFORMATION**

**In situ adsorption of red onion (*Allium cepa*) natural dye on cellulose model films and fabrics exploiting chitosan as a natural mordant**

*Rafael Grande<sup>a</sup>, Riikka Räisänen<sup>b</sup>, Jinze Dou<sup>a</sup>, Satu Rajala<sup>b</sup>, Kii Malinen<sup>a</sup>, Paula A.*

*Nousiainen<sup>\*a</sup>, Monika Österberg<sup>\*a</sup>*

<sup>a</sup>Aalto University, School of Chemical Engineering, Department of Bioproducts and Biosystems,  
Vuorimiehentie 1, 02150 Espoo, Finland

<sup>b</sup>University of Helsinki, Craft Science, Siltavuorenpenger 10, 00014 Helsinki, Finland

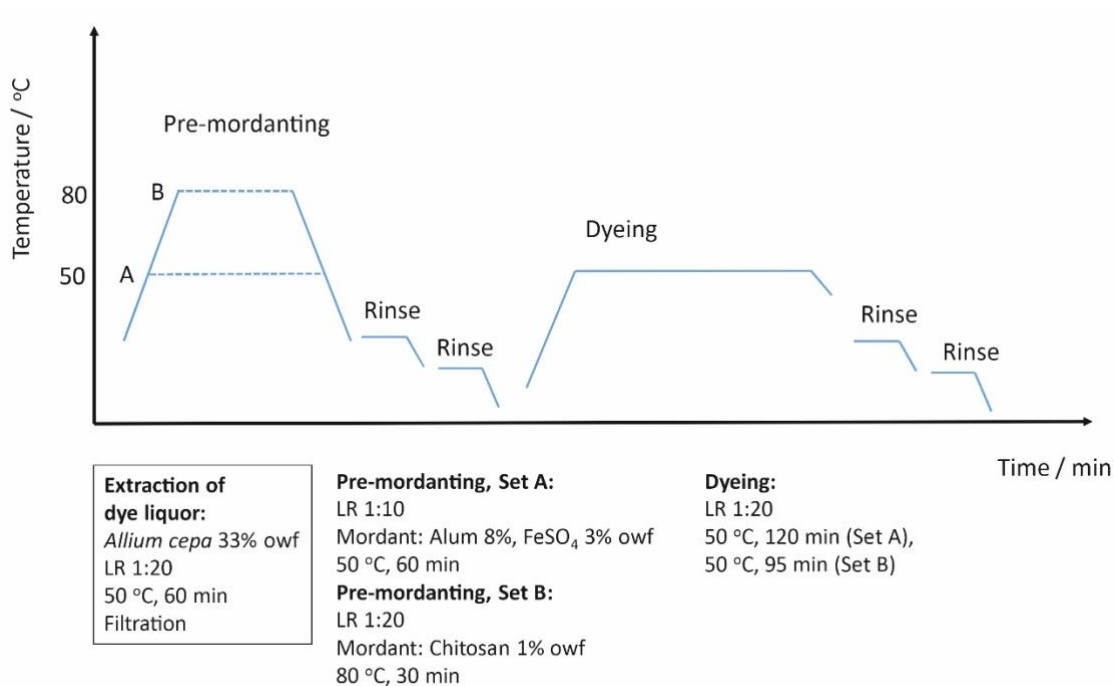

Figure S1. Procedure simulating industrial dyeing of cotton fabric with red onion (*A. cepa*) dye. owf = on the weight of the fiber.

Table S1. The pre mordanting and dyeing conditions of the experimental set-ups A and B. Mordant amount is measured by percentage on the weight of the fibre (owf).

| Sample | Pre mordanting       |     | Dyeing |
|--------|----------------------|-----|--------|
|        | Mordant (owf)        | pH  | pH     |
| A1-0   | 0                    | -   | 4.1    |
| A2-Al  | Alum 8%              | 3.5 | 3.3    |
| A3-Fe  | FeSO <sub>4</sub> 3% | 3.6 | 3.9    |
| B1-Ch  | Ch 1%                | 3.1 | 3.8    |

a)

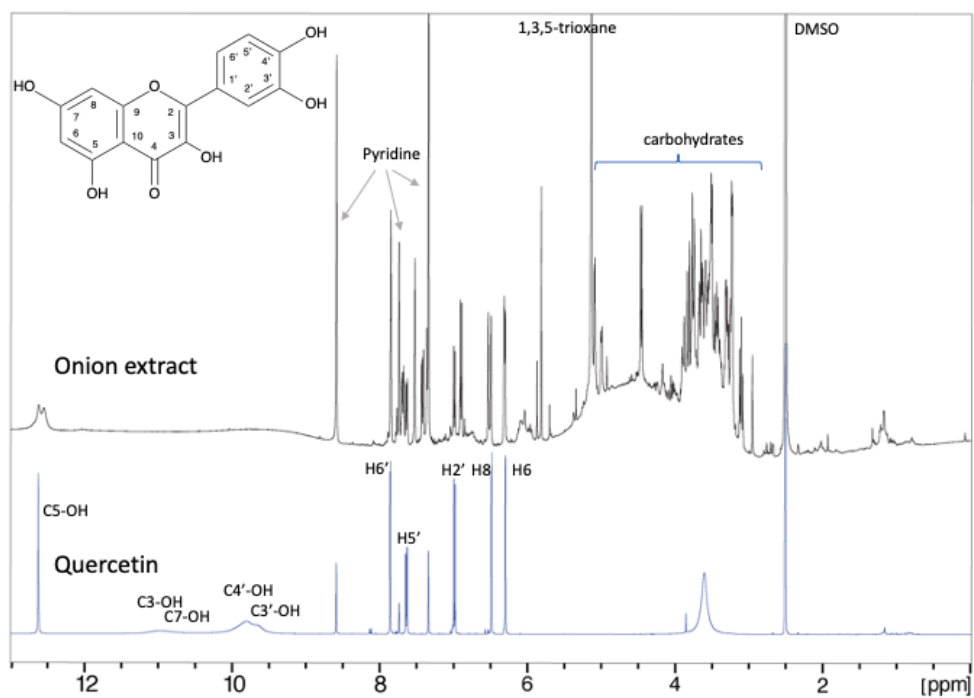

b)

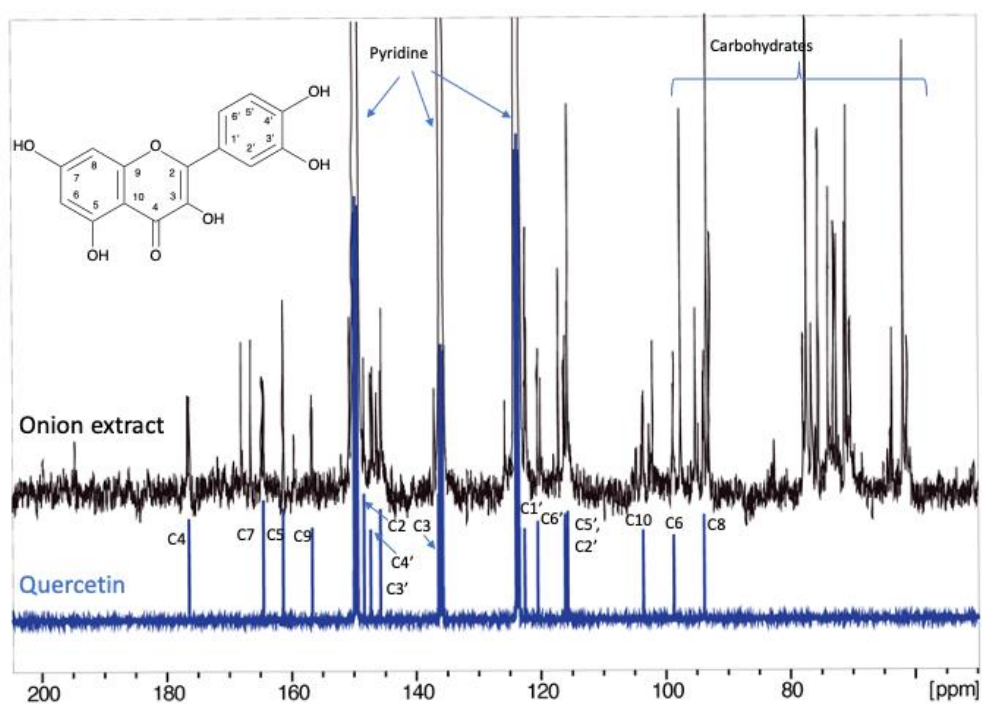

c)

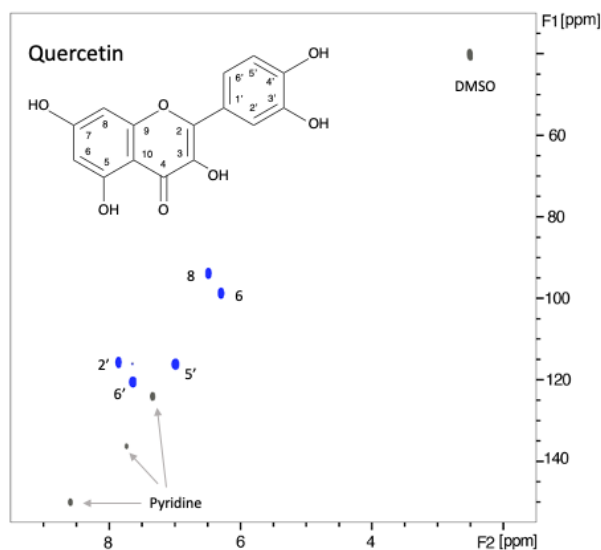

d)

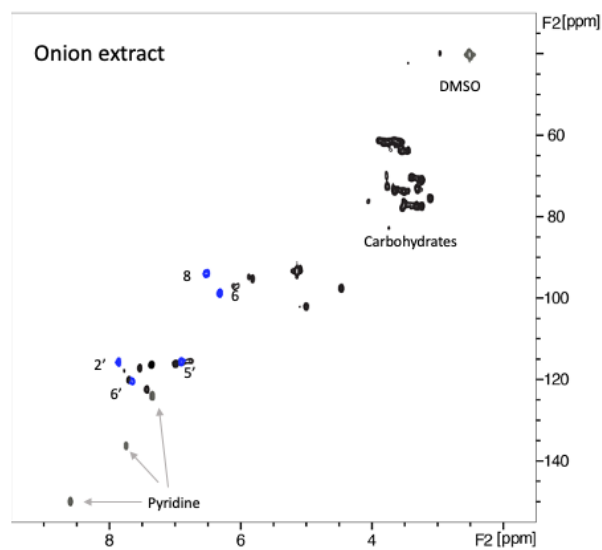

Figure S2. a)  $^1\text{H}$  and b)  $^{13}\text{C}$  NMR spectra of ROD in comparison with standard quercetin in  $\text{DMSO-d}_6/\text{pyridine-d}_5$ . 2D  $^1\text{H}$ - $^{13}\text{C}$  HSQC NMR spectrum ( $\delta_{\text{C}}/\delta_{\text{H}}$ , 30–155/1.5–9.5 ppm) with c) standard quercetin and d) onion extract in  $\text{DMSO-d}_6/\text{pyridine-d}_5$ .

The purified pectin (**Table S2**) was systematically chemically characterized by NMR spectroscopy and chromatography techniques (i.e., HPAEC-PAD and HPLC). The galacturonic acid (GalA) represented approximately 57% of the identified carbohydrates (**Table S3**) and this explains that the 1,4-glycosidically linked GalA unit is the dominant linkage at pectin. Specifically, in HSQC NMR spectrum of the purified pectin fraction, two strong and well resolved chemical shifts (**Fig. S3**) at  $\delta_{\text{C}}/\delta_{\text{H}}$ , 52.5/3.72 ppm and  $\delta_{\text{C}}/\delta_{\text{H}}$ , 20.9/2.11 ppm indicated the strong presence of C/H atoms of the methyl ester groups of carboxylic acid moiety of 1,4- $\alpha$ -D-GalpA and the acetate ester-groups of at the O2/O3-position of 1,4- $\alpha$ -D-GalpA. Moreover, after the two-hours saponification, the detected methanol and acetic acid are directly proportional to the released pectin esters, respectively.<sup>1</sup> Interestingly, these carboxylic acid-carboxylate functional groups of pectin are known to absorb dyes and metal ions.<sup>2</sup> The detailed structural chemical characteristic of pectin of the red onion extract is out of scope of this present study.

Table S2. Mass Balance of the Hot Water Extract (**HWE**) from Onion. The standard deviations are included in the parenthesis.

|                                  | mg/g extracts |
|----------------------------------|---------------|
| Arabinose                        | 1.0 (0.2)     |
| Galactose                        | 0.4 (0.1)     |
| Glucose                          | 121 (6.3)     |
| Mannose                          | 10 (1.7)      |
| Total carbohydrates <sup>a</sup> | 132           |
| Quercetin <sup>b</sup>           | 53 (4.7)      |
| Pectin <sup>c</sup>              | 203 (13)      |
| Ash                              | 58            |
| Sum                              | 447           |

<sup>a</sup> Determined by HPAEC-PAD

<sup>b</sup> Determined by <sup>1</sup>H NMR

<sup>c</sup> Gravimetric differences of the precipitates from the pectin purification step

a)

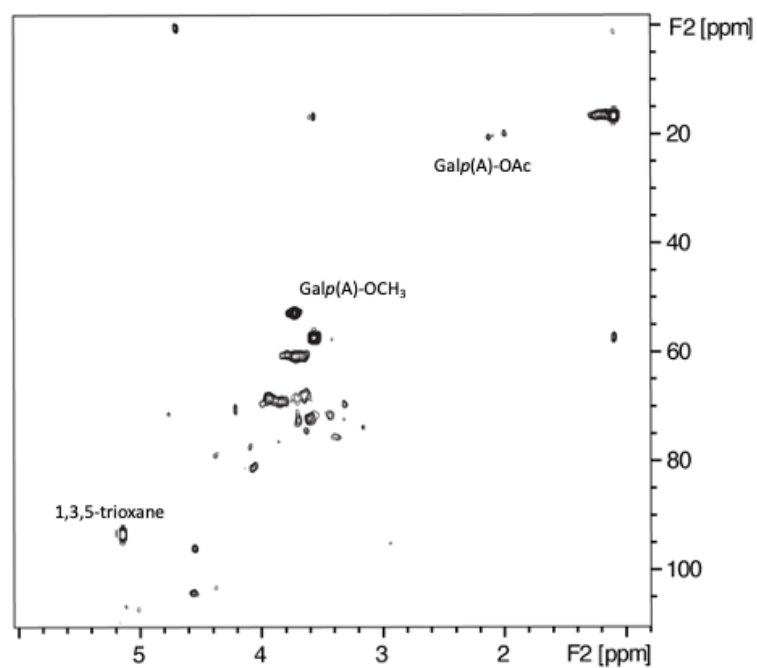

b)

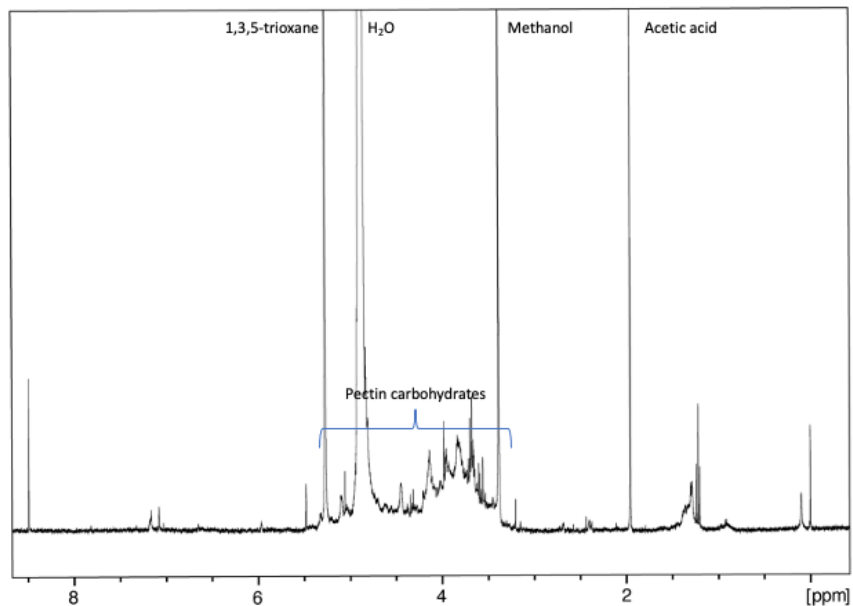

Figure S3. a) 2D HSQC NMR spectra regions ( $\delta_C/\delta_H$ , 0–110/0–6.0 ppm) of the purified Pectin from onion water extracts using D<sub>2</sub>O as the solvent and b) <sup>1</sup>H NMR spectrum of the purified Pectin from onion water extracts treated under alkaline (NaOH 0.45 mol/l) conditions for two hours using D<sub>2</sub>O as the solvent.

Table S3. Chemical characteristics of the purified pectin (**Table 1**) by HPAEC-PAD and HPLC. The standard deviations are included in the parenthesis.

|                   | mg/g pectin |
|-------------------|-------------|
| Arabinose         | 13 (1)      |
| Rhamnose          | 26 (3)      |
| Galactose         | 50 (5)      |
| Glucose           | 127 (13)    |
| Galacturonic acid | 283         |
| sum               | 499         |

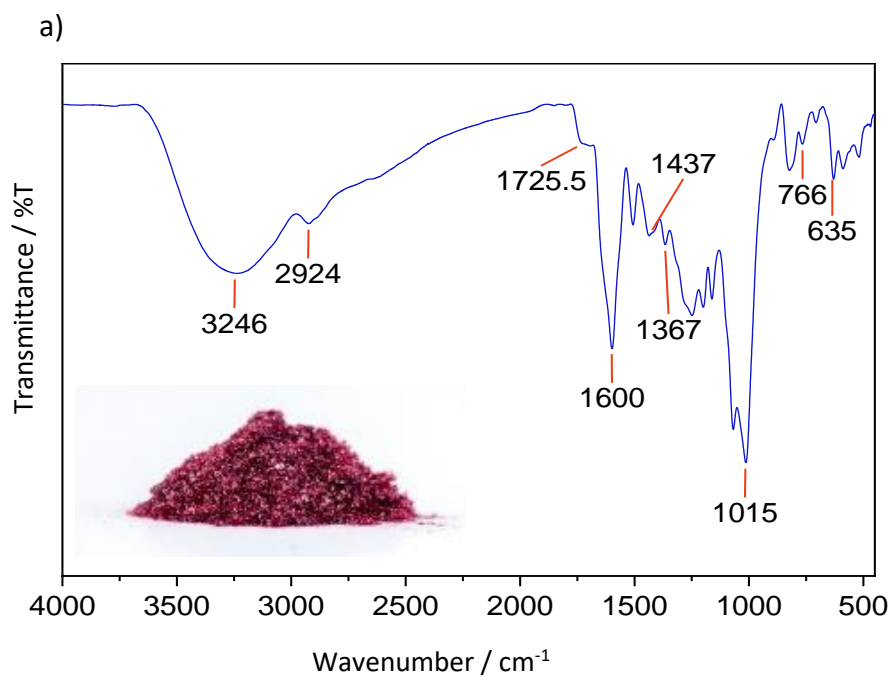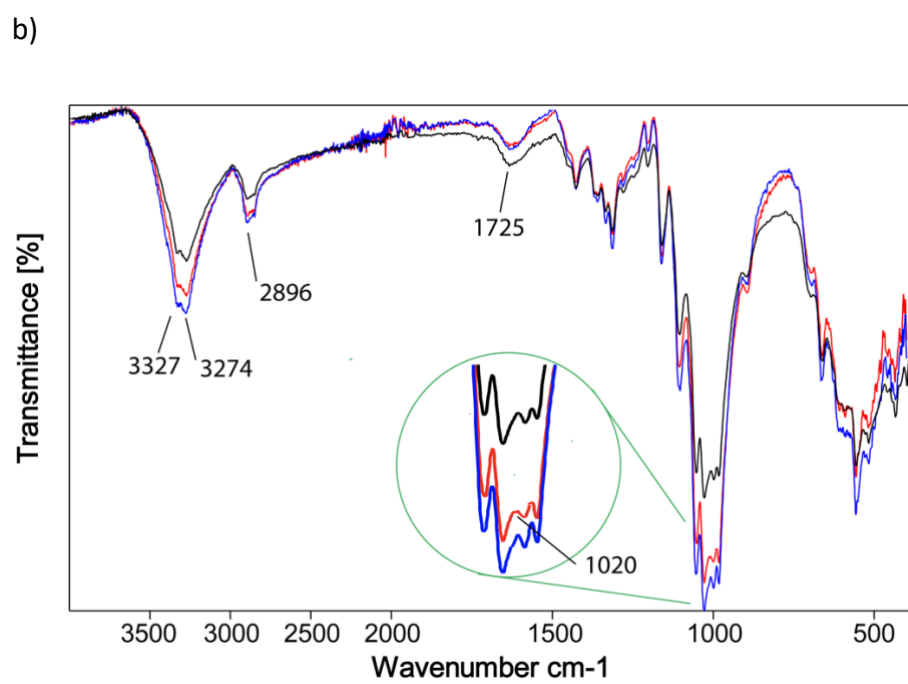

Figure S4. FTIR spectra of **a)** red onion dye (ROD), dried powder (insert) and **b)** untreated and dyed cotton fabrics. Blue line = untreated cotton fabric, red = cotton and chitosan, black = cotton with chitosan mordanting and ROD.



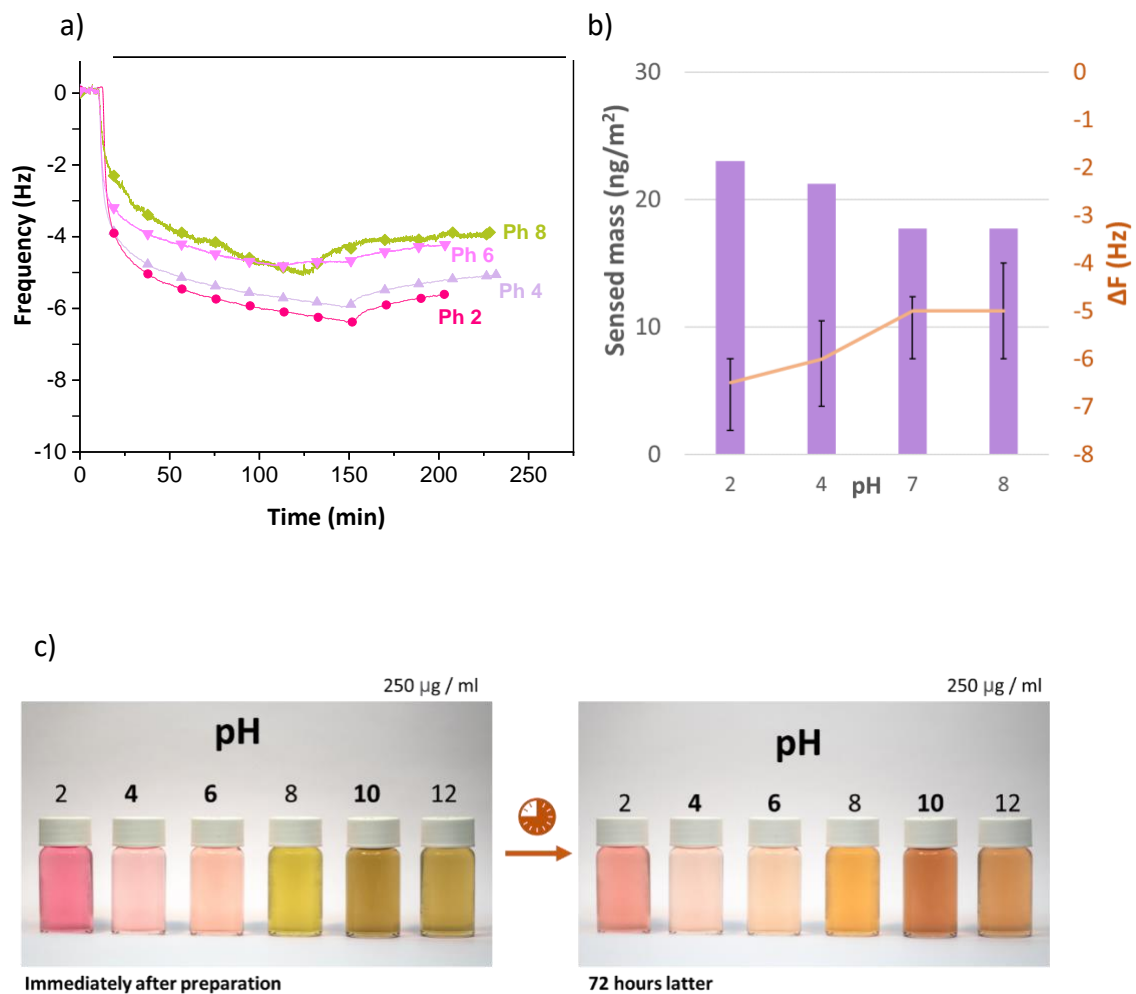

Figure S5. a) Change in oscillation frequency (fifth overtone) as a function of time of ROD in different pH conditions adsorbed onto CNF model films. b) Maximum sensed mass calculated from curve “a)” using Sauerbrey’s relation c) visual appearance of ROD solutions (250 μg/mL) under different pH immediately after the solubilization and 72 h later.

Table S4. CIE L\*, a\*, b\* color coordinates and visual colour, K/S values at minimum reflectance (Rmin) and at 480 and 520 nm, and light fastness (LF, evaluation 1-8 where 8 is the best value), washing fastness (evaluation 1-5, where 5 is the best value) and rubbing fastness (1-5) values of the dyed cotton fabrics. The total color change (CC) as  $\Delta E$  values of the dyed samples before and after washing at pH 7 and pH 10 laundering liquors.

| Sample No. | CIELab |       |       | K/S Rmin | K/S 480 nm | K/S 520 nm | LF | CC CIELab       |                  | Washing fastness |          |         |          |          |           |          |           |         |          |         |          | Rubbing fastness |          |       |       |
|------------|--------|-------|-------|----------|------------|------------|----|-----------------|------------------|------------------|----------|---------|----------|----------|-----------|----------|-----------|---------|----------|---------|----------|------------------|----------|-------|-------|
|            | L*     | a*    | b*    |          |            |            |    | $\Delta E$ pH 7 | $\Delta E$ pH 10 | CC pH 7          | CC pH 10 | WO pH 7 | WO pH 10 | PAN pH 7 | PAN pH 10 | PES pH 7 | PES pH 10 | PA pH 7 | PA pH 10 | CO pH 7 | CO pH 10 | CA pH 7          | CA pH 10 | D(wf) | D(wp) |
| A1-0       | 70.14  | 3.88  | 13.72 | 9.13     | 0.54       | 0.51       | 5  | 10.13           | 7.25             | 3,Y,Str          | 3/4      | 3/4     | 4        | 4        | 5         | 5        | 5         | 4/5     | 5        | 4/5     | 5        | 4/5              | 5        | 4/5   | 4/5   |
| A2-Al      | 57.39  | -6.61 | 26.71 | 7.41     | 1.26       | 0.97       | 3  | 5.89            | 19.35            | 4                | 1/2      | 4       | 4        | 4/5      | 4/5       | 5        | 5         | 5       | 5        | 5       | 5        | 5                | 4/5      | 4/5   | 4/5   |
| A3-Fe      | 37.46  | -1.22 | 9.92  | 9.85     | 4.39       | 4.17       | 4  | 1.36            | 19.39            | 5                | 2        | 4/5     | 4/5      | 4        | 4         | 5        | 4         | 5       | 4        | 5       | 5        | 5                | 5        | 4     | 4     |
| B1-Ch      | 60.29  | 11.70 | 6.06  | 6.26     | 1.00       | 1.17       | 1  | 25.31           | 17.13            | 2,G              | 1        | 4/5     | 4/5      | 4/5      | 4/5       | 4/5      | 4/5       | 4       | 4/5      | 3/4     | 4/5      | 4/5              | 4/5      | 4/5   | 4/5   |

Y=yellower, G=greener, Str=stronger, D(wf)=direction weft, D(wp)=direction warp

## References

- 1 Müller-Maatsch J, Caligiani A, Tedeschi T, Elst K, Sforza S. Simple and Validated Quantitative <sup>1</sup>H NMR Method for the Determination of Methylation, Acetylation, and Feruloylation Degree of Pectin. *J Agric Food Chem*. 2014;62(37):9081-9087. doi:10.1021/jf502679s
2. Rakhshae R, Panahandeh M. Stabilization of a magnetic nano-adsorbent by extracted pectin to remove methylene blue from aqueous solution: A comparative studying between two kinds of cross-liked pectin. *J Hazard Mater*. 2011;189(1-2):158-166. doi:10.1016/j.jhazmat.2011.02.013
